# Supplementary material for: Flood Inundation Modeling by Integrating HEC–RAS and Satellite Imagery: A Case Study of the Indus River Basin
Source: MDPI journal article supplement (doi:10.3390/w14192984), 2022-09-22
Supplement: s1 [file s1]

Archive with 1 entries (1 files):
- water-1877613-supplementary.pdf
