# Supplementary material for: Flood Inundation Modeling by Integrating HEC–RAS and Satellite Imagery: A Case Study of the Indus River Basin
Source: MDPI journal article supplement (doi:10.3390/w14192984), 2022-09-22
Supplement: s1 [file s1 › water-1877613-supplementary.pdf]

# Supplementary Material

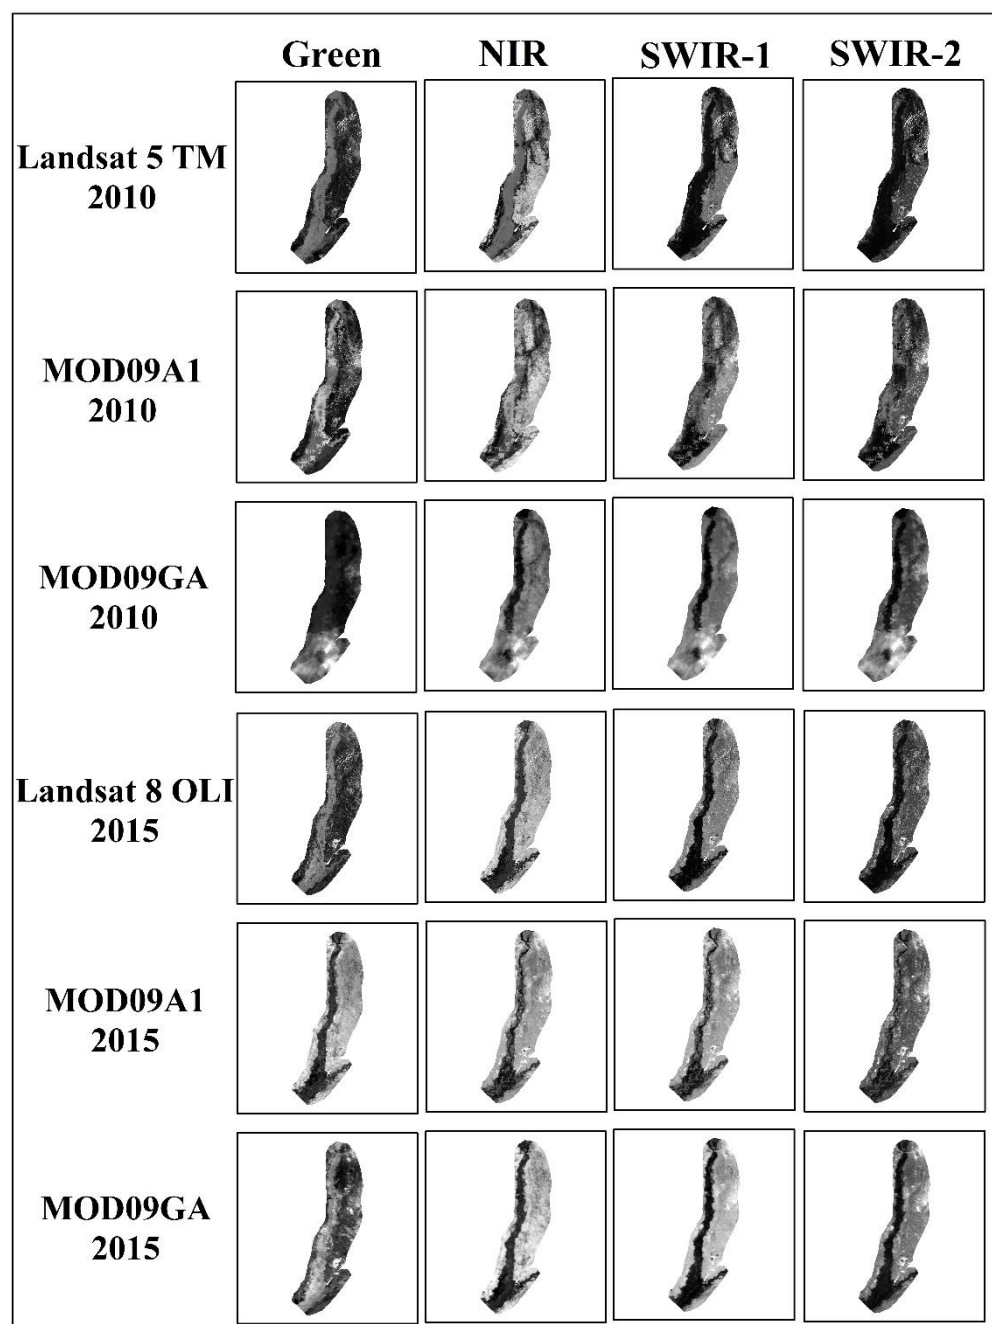

**Figure S1.** Bands of Landsat 5 Thematic Mapper, Moderate Resolution Imaging Spectroradiometer MOD09A1, MOD09GA, and Landsat 8 Operational Land Imager used in the Analysis.

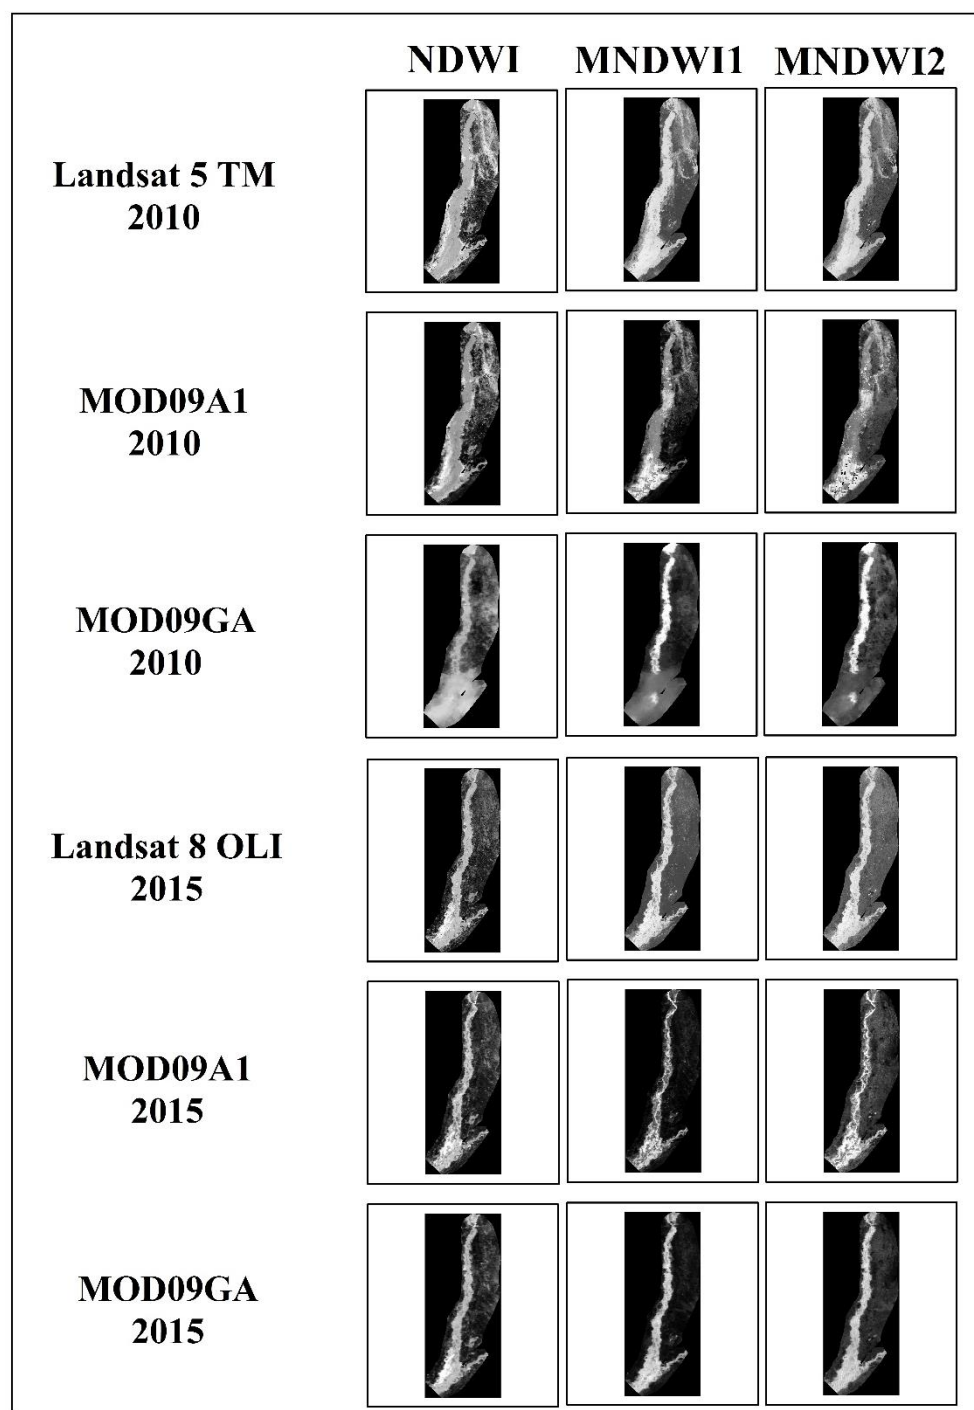

**Figure S2.** Normalized Difference Water Index (NDWI), Modified Normalized Difference Water Index1, and Modified Normalized Difference Water Index2 used for Flood Mapping.
